# Supplementary material
Source: PubMed Central journal article supplement (PMC2901704)
Supplement: supp_192_12_3174__1.pdf [file supp_192_12_3174__1.pdf]

1 **TABLE A1. Scoring of engulfment**

| <u>Strain</u>  | <u>Time</u> | <u>Total cells</u> | <u>% Migration</u> | <u>% Fusion</u> |
|----------------|-------------|--------------------|--------------------|-----------------|
| KP718 (WT)     | T3          | 67                 | 7.4                | 64              |
|                | T4          | 121                | 5.6                | 76              |
| KP1072 (E88A)  | T3          | 370                | 4.2                | 0               |
|                | T4          | 213                | 0                  | 0               |
| KP1079 (R106A) | T3          | 400                | 19.8               | 0.8             |
|                | T4          | 302                | 22.2               | 2               |
| KP1099 (K203A) | T3          | 319                | 1.3                | 0               |
|                | T4          | 331                | 3.6                | 0               |
| KP1102 (D210A) | T3          | 569                | 40.2               | 4.4             |
|                | T4          | 351                | 39.6               | 13.4            |

2  
3 Quantification of engulfment in the various mutants studied here. Membrane fusion  
4 assays were scored for the percent of cells showing exclusion of FM 4-64 from the  
5 forespore membrane, indicating the completion of engulfment (% complete). The same  
6 images were scored to determine the percent of cells showing significant membrane  
7 migration, as indicated by the curving of the septal membrane more than half of the way  
8 around the forespore (% migration). This shows that SpoIID<sup>E88A</sup> and SpoIID<sup>K203A</sup> have a  
9 defect in septal thinning, with no membrane migration or complete engulfment observed  
10 at any timepoint. These numbers also demonstrate that SpoIID<sup>D210A</sup> has a decreased  
11 rate of membrane migration, since only 44.6% of cells have migrated more than half of  
12 the distance around the forespore or completed engulfment at T3. If this strain was  
13 blocked after membrane migration, then one would expect a similar percent of cells with  
14 membrane migration as in wildtype, or 71.4% of cells should show migration at least

15 halfway at T3. SpoIID<sup>R106A</sup> supports membrane migration at an even slower rate than

16 SpoIID<sup>D210A</sup>.

17

17 **TABLE A2. Primers used in this study.**

| Primer Name | Sequence                                                                               | Purpose |
|-------------|----------------------------------------------------------------------------------------|---------|
| JGP58       | ACA CAG ATG TTC GCA GTG TAT AAA AGC                                                    | Q134A   |
| JGP59       | ATG TTC CAG GTG GCA AAA AGC AAA GCG                                                    | Y136A   |
| JGP70       | ACA AGC AAC GGC TAC GCA GAG AATG CAG AAG<br>CT                                         | T188A   |
| RMSIIDM1    | GAA AAC ATT CCG CTT GCG GAG TAT GTG ATT<br>GGA G                                       | E78A    |
| RMSIIDM2    | C TCC AAT CAC ATA CTC CGC AAG CGG AAT GTT<br>TTC                                       | E78A    |
| RMSIIDM3    | CCT GAA GCG CTG GCG GCC CAG GCG CTT GCC                                                | K99A    |
| RMSIIDM4    | GGC AAG CGC CTG GGC CGC CAG CGC TTC AGG                                                | K99A    |
| RMSIIDM5    | GCG CTG AAA GCC GCG GCG CTT GCC GCC                                                    | Q101A   |
| RMSIIDM6    | GGC GGC AAG CGC CGC GGC TTT CAG CGC                                                    | Q101A   |
| RMSIIDM7    | GCG CTT GCC GCC GCA ACA TTT ATT GTC AG                                                 | R106A   |
| RMSIIDM8    | CT GAC AAT AAA TGT TGC GGC GGC AAG CGC                                                 | R106A   |
| RMSIIDM9    | GCC GCC AGA ACA GCG ATT GTC AGA CTG ATG G                                              | F108A   |
| RMSIIDM10   | C CAT CAG TCT GAC AAT CGC TGT TCT GGC GGC                                              | F108A   |
| RMSIIDM11   | GGC AAA ATC TTA ACG GCC AAC AAC CAG CCG                                                | Y171A   |
| RMSIIDM12   | CGG CTG GTT GTT GGC CGT TAA GAT TTT GCC                                                | Y171A   |
| RMSIIDM13   | C CCA TAT TTA GCA AGC GTC AAA AGC CC                                                   | K203A   |
| RMSIIDM14   | GG GCT TTT GAC GCT TGC TAA ATA TGG G                                                   | K203A   |
| RMSIIDM15   | C CCA TAT TTA AAA GCC GTC AAA AGC CC                                                   | S204A   |
| RMSIIDM16   | GG GCT TTT GAC GGC TTT TAA ATA TGG G                                                   | S204A   |
| RMSIIDM17   | GC CCA TGG GCT AAA AAG TCT CCG                                                         | D210A   |
| RMSIIDM18   | GG GCT TTT GAC GGC TTT TAA ATA TGG G                                                   | D210A   |
| RMSIIDM19   | C GTC GCC TCC GCA ATG CCG GCA ACC                                                      | E88A    |
| RMSIIDM20   | GGT TGC CGG CAT TGC GGA GGC GAC G<br>GC CGC TGT AAA GGT TTT CGC TGC CTT ATA TTT<br>CGG | T219A   |
| RMSIIDM21   | CGG                                                                                    | T219A   |
| RMSIIDM22   | GG GCT TTT GAC GGC TTT TAA ATA TGG G                                                   | T219A   |
| JGP71       | TTG ATT TGC GGT TCG TGC GAC GGG A                                                      | Y65A    |
| JGP72       | TTT CAG CGC TTC AGG TGC AAA GGT                                                        | K94A    |
| JGP73       | CTG GGC TTT CAG CGC TGC AGG TTT                                                        | E96A    |
| JGP74       | CAG TCT GAC AAT AAA TGC TCT GGC G                                                      | T107A   |
| JGP75       | TGG GCT TTT GAC GCT TGC TAA ATA T                                                      | K203A   |
| JGP76       | CCA TGG GCT TTT GAC TGC TTT TAA A                                                      | S204A   |
| JGP77       | CTT TTT ATC CCA TGG TGC TTT GAC                                                        | S207A   |
| JGP78       | TGC CTT ATA TTT CGG TGC CTT TTT                                                        | S213A   |
| JGP79       | TTT CGT TGC CTT ATA TGC CGG AGA                                                        | K215A   |
| JGP80       | CTG AAA TTC TGC CGC TGC AAA GGT                                                        | T223A   |
| JGP81       | AAG CTT TTG CTG AAA TGC TGC CGC T                                                      | E226A   |
| JGP82       | GAC GCC AAG CTT TTG TGC AAA TTC T                                                      | Q228A   |
| JGP83       | CAG CTT GAC GCC AAG TGC TTG CTG A                                                      | K230A   |
| JGP84       | GCT AGA TCC ATC CAG TGC GAC GCC A                                                      | K234A   |
| JGP85       | GGCTCCACTGGTGGCAGATACACAGATG                                                           | D128A   |

|           |                                       |            |
|-----------|---------------------------------------|------------|
| JGP86     | TCA CTG GTG GAT GCA ACA CAG ATG TTC   | D129A      |
| JGP87     | CTG GTG GAT GAT GCA CAG ATG TTC CAG   | T130A      |
| JGP88     | GCG GTA GCC AGT GCA CAA GGC AAA ATC   | T164A      |
| JGP89     | GGC AAA ATC TTA GCA TAC AAC AAC CAG   | T170A      |
| JGP90     | AAG GCA ACG AAA GCA TTT ACA GCG GCA   | T221A      |
| JGP91     | CTG GAT GGA TCT GCA GCA GTA GGG AAG   | S239A      |
| JGP92     | ATT AAC GGC AAG GCA CTG AAA GGA AGA   | T262A      |
| JGP93     | AAG CGA AAT GGA GCA AGA ATT ACA GTC   | D286A      |
| JGP94     | GAT TTT GAA TGG GCA CGA AAT GGA GAC   | K282A      |
| JGP95     | TTT GAA TGG AAG CGA AAT GGA GAC ACA   | R283A      |
| JGP96     | ATT CCC GTC TAT GCA ACC GCA AAT CAA   | R66A       |
| JGP97     | TTC CAG GTG TAT GCA AGC AAA GCG GAG   | K137A      |
| JGP98     | ACA GAG AAT GCA GCA GCT TAT TGG ACA   | E192A      |
| JGP99     | TAT AAG GCA ACG GCA ACC TTT ACA GCG   | K220A      |
| JGP100    | GCA GAA TTT CAG GCA AAG CT GGC GTC    | Q229A      |
| JGP101    | TCC AAT CAC ATA TGC TTC AAG CGG AAT   | E79A       |
| JGP102    | GAC TCC AAT CAC TGC CTC TTC AAG CGG   | T80A       |
| JGP103    | AAA GGT TGC CGG TGC TTC GGA GGC GAC   | M89A       |
| JGP104    | TTT AAA GGT TGC TGC CAT TTC GGA GGC   | P90A       |
| JGP105    | GCC GTT GCT TGT TGC GAA AAA GGA TGC   | S182A      |
| JGP106    | GTA GCC GTT GCT TGC GGA GAA AAA GGA   | T183A      |
| JGP107    | GAC GCT TTT TAA TGC TGG GAT AGC ACT   | Y201A      |
| JGP108    | CAT CCC CAC ACC TGC GCC AAA TCC TCT   | H297A      |
| JGP109    | TTG GCT CAT CCC TGC ACC GTG GCC AAA   | V299A      |
| JGP110    | TCC GTA TTG GCT TGC CCC CAC ACC GTG   | M301A      |
| JGP111    | ATT CGC TCC GTA TGC GCT CAT CCC CAC   | Q303A      |
| JGP112    | AAG CGG AAT GTT TGC TAC GGA TTG ATT   | E73A       |
| JGP113    | GAA GCA TCC TTT GCA TCC ACA AGC AAC   | F181A      |
| JGP116    | GGT TGC CGG CAT TTC TGC GGC GAC GAC   | S87A       |
| JGP117    | CAC ACC GTG GCC TGC TCC TCT CGT CG    | F295A      |
| JGPD358   | GAAGCTCCTAAAGGCTCACTG                 | sequencing |
| JGP2dp    | GCTTGTCCTGCCCATAGACT                  | sequencing |
|           | GGCATGGATGAACTATACAAATGAAACAATTCGCA   |            |
| RMSP10IID | ATCACAC                               | GFP-IID    |
|           | GTGTGATTGCGAATTGTTTCATTTTGTATAGTTCATC |            |
| RMSP11IID | CATGCC                                | GFP-IID    |
| RMSP12IID | G CAT AAT AAG GAA GCG GGG GCC AGC G   | GFP-IID    |
| RMSP13IID | C GCT GGC CCC CGC TTC CTT ATT ATG C   | GFP-IID    |

19 **MOVIE A1. GFP-SpoIIP localization in wild type.** Cells were sporulated at 30°C in  
20 the presence of FM4-64 and placed on a 1.2% agarose/A+B pad containing FM4-64 at  
21  $t_2$  after sporulation initiation. Cells were imaged on the pad inside a climate-controlled  
22 chamber at 30°C. Membranes were stained with FM 4-64. Images were collected five  
23 minutes apart for 1 hr. Membrane migration is seen in the majority of cells in this strain  
24 and engulfment takes approximately 50 minutes to complete. During the early stages of  
25 migration, GFP-SpoIIP forms bright foci at the leading edges of the membranes. When  
26 the membranes reach halfway, GFP-SpoIIP becomes an elongated focus, forming a  
27 gradient that stretches from the leading edge backwards. After completion of migration,  
28 GFP-SpoIIP forms a diffuse cap around the top half of the forespore.

29 Membrane migration is usually symmetric in this strain with the leading edges  
30 meeting directly at the top of the cell. However, in some cells, the membranes appear  
31 to inchworm up, with the left side moving slightly ahead in one frame and the right side  
32 moving slightly ahead in the next. This suggests that the membranes don't move as a  
33 single sheet up and around the forespore.

34

34 **MOVIE A2. GFP-SpoIIP localization in a SpoIID<sup>D210A</sup> background.** Cells prepared as  
35 described for Movie A1. Membrane migration is seen in few cells in this strain. Often,  
36 open bulges form early and become closed in later frames. The rate of membrane  
37 migration is hard to assess due to the failure of many sporangia to complete engulfment  
38 during the data collection period, but is likely to be >60 minutes. GFP-SpoIIP is seen in  
39 three distinct patterns corresponding with different membrane migration events. In large  
40 blebs, GFP-SpoIIP is diffuse throughout the bleb, sometimes forming a focus at the  
41 center of the septum. In evenly migrating membranes, GFP-SpoIIP forms two, equally  
42 bright foci, one at each leading edge. In asymmetrically migrating cells, GFP-SpoIIP  
43 forms a bright foci at the leading edge that is that migrating more quickly (more  
44 advanced) and a weak, or no, focus at the lagging edge. GFP-SpoIIP tends to be  
45 dynamic in its localization in this strain, with lower intensity than the wildtype  
46 background and with changing intensities in many foci and throughout blebs. Together,  
47 these results indicate that the SpoIID<sup>D210A</sup> mutation is partially defective in the  
48 stabilization of SpoIIP to the leading edge and that SpoIIP localization is associated with  
49 an increased rate of membrane migration.
